# Supplementary material for: Exploring the versatility of dendrimer-stabilized silver nanoparticle platforms: synthesis, characterization, and protein immobilization for enhanced biosensing applications
Source: Royal Society of Chemistry journal article supplement (doi:10.1039/d4nj02593h), 2024-01-01
Supplement: d4nj02593h1.pdf [file d4nj02593h1.pdf]

**Exploring the Versatility of Dendrimer-Stabilized Silver Nanoparticles Platforms:  
Synthesis, Characterization, and Protein Immobilization  
for Enhanced Biosensing Applications**

Denys R. Oliveira <sup>a,b</sup>, Aldo J.G. Zarbin <sup>b,\*</sup>, Dênio E. P. Souto <sup>a,\*</sup>

<sup>a</sup> Laboratório de Espectrometria, Sensores e Biosensores - Department of Chemistry,  
Federal University of Paraná (UFPR), Curitiba, PR, 81530-900, Brazil.

<sup>b</sup> Grupo de Química de Materiais - Departamento de Química- Department of Chemistry,  
Federal University of Paraná (UFPR), Curitiba, PR, 81530-900, Brazil.

**\*Corresponding authors:**

e-mail address: [denio.souto@ufpr.br](mailto:denio.souto@ufpr.br); [aldozarbin@ufpr.br](mailto:aldozarbin@ufpr.br) .

# 1 STRUCTURAL AND MORPHOLOGICAL CHARACTERIZATION

## 1.1 Ultraviolet-Visible Spectroscopy (Uv-Vis)

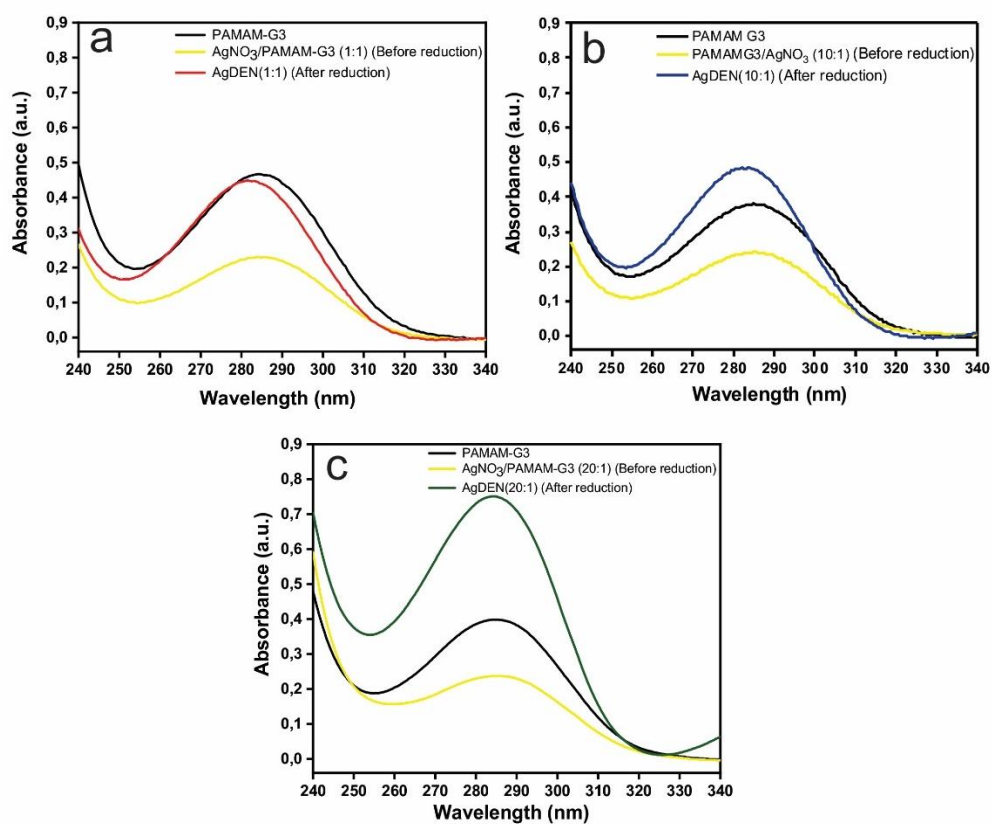

**Figure S1** — Spectra UV-Vis in the region 240 a 340 nm : (a) AgDEN (1:1), (b) AgDEN (10:1) and (c) AgDEN (20:1).

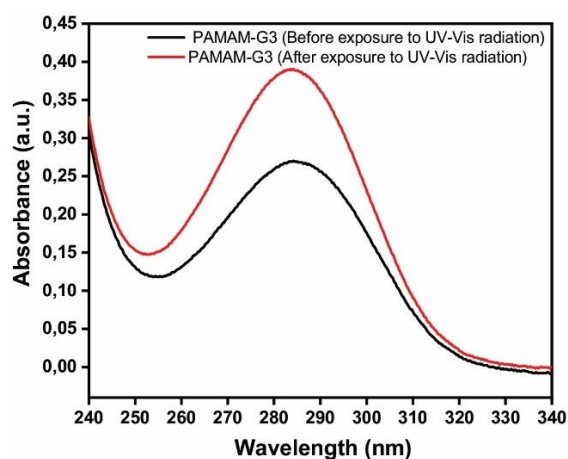

**Figure S2** — UV-Vis spectra of PAMAM-G3 ( $0,05 \text{ mmol L}^{-1}$ ) before and after exposure to UV radiation ( $8 \text{ W}$ ,  $\lambda_{\text{max}} = 256 \text{ nm}$ ).

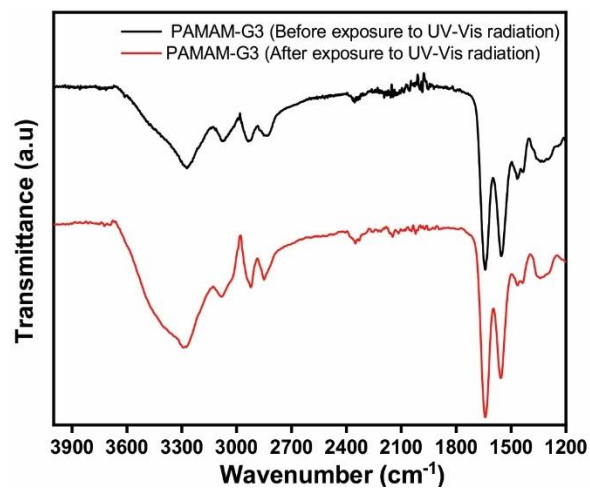

**Figure S3** – ATR-FTIR Spectroscopy spectra of PAMAM-G3 (0,05 mmol L<sup>-1</sup>) before and after exposure to UV radiation (8 W,  $\lambda_{\text{max}} = 256$  nm).

## 2 SURFACE PLASMON RESONANCE (SPR)

### 2.1 Evaluation in situ via SPR of the interaction of PAMAM-G3, AgNPs and AgDENs on the metallic surface (gold) for biosensing proposal

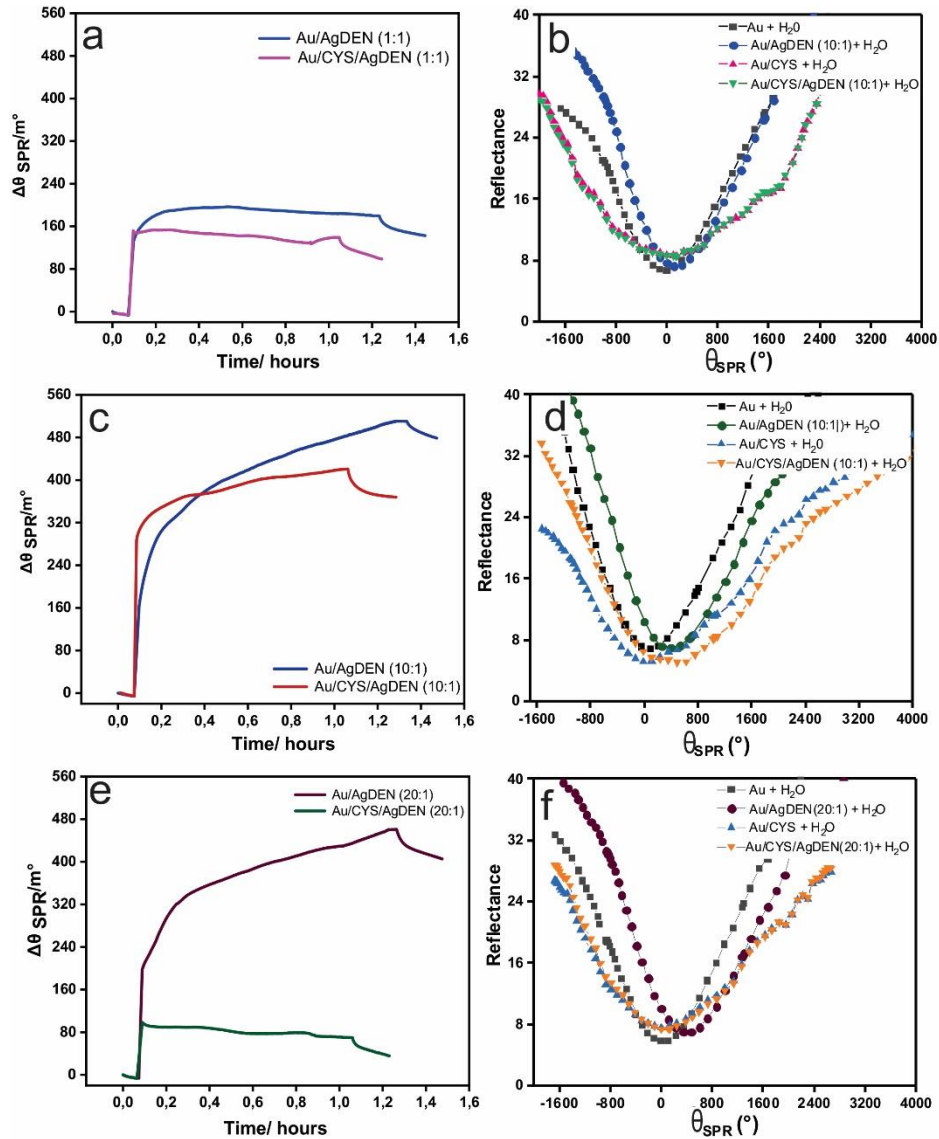

**Figure S4** – Sensorgrams and SPR curves of reflectance obtained in real-time show the interaction between the AgDENs and the modified and unmodified gold surface with CYS-SAM. The sensorgrams present their typical phases: the baseline obtained with ultrapure water, the binding phase of the AgDENs, the stationary phase, and the washing phase with ultrapure water: (a) and (b) AgDEN (1:1), (c) and (d) AgDEN (10:1), (e) and (f) AgDEN (20:1).

## 2.2 Immobilizing the Hsc 70 and CALB L on the platform Au/AgDENs for biosensing proposal

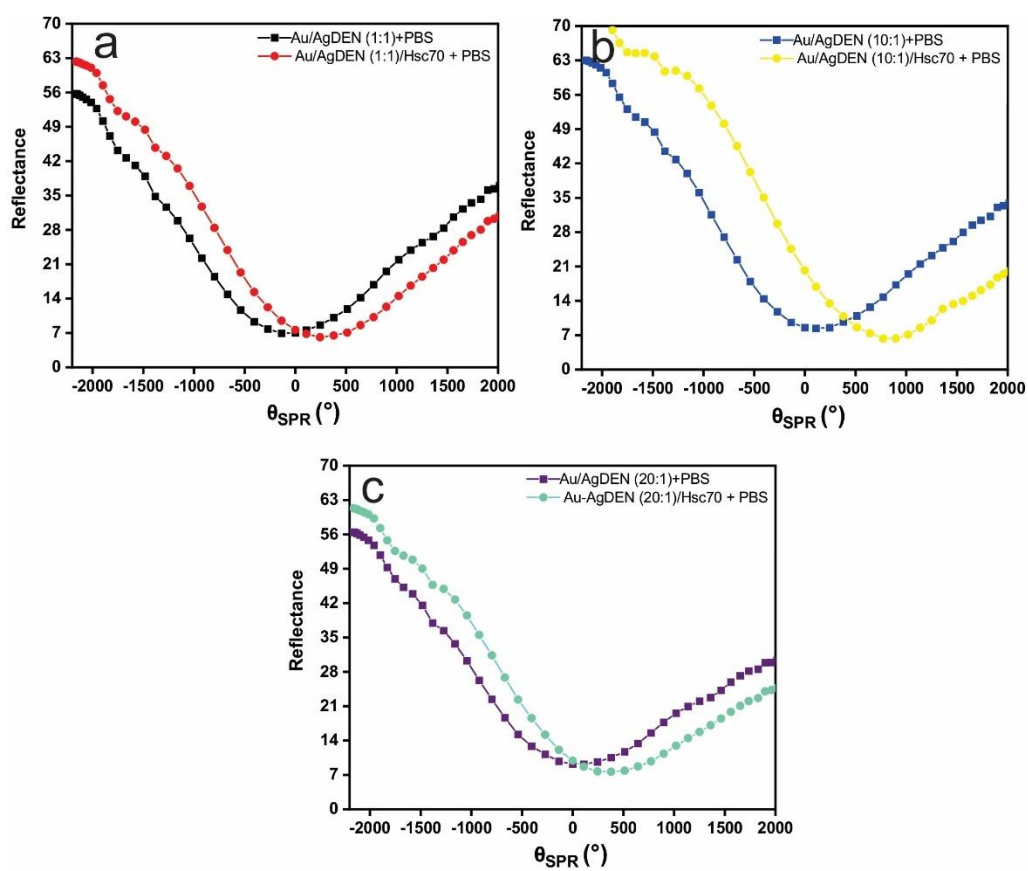

**Figure S5** - SPR curves of reflectance obtained in real-time. The figure shows the difference between the reflectance curves before and after immobilization of the Hsc70 protein: (a) AgDEN (1:1), (b) AgDEN (10:1), and (c) AgDEN (20:1).

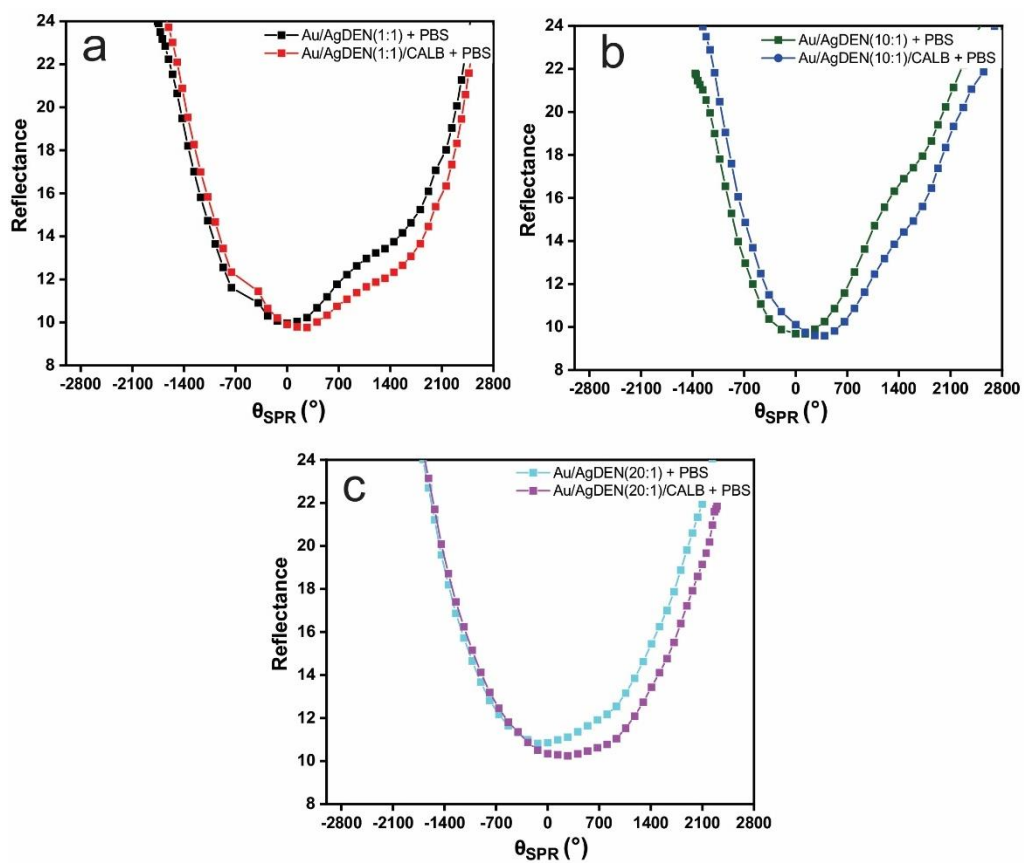

**Figure S6** - SPR curves of reflectance obtained in real-time. The figure shows the difference between the reflectance curves before and after immobilization of the CALB: (a) AgDEN (1:1), (b) AgDEN (10:1), and (c) AgDEN (20:1).
